# Supplementary material for: Mesenchymal Stem Cells Exploit Extracellular Matrix as Mechanotransducer
Source: PubMed Central journal article supplement (PMC3741624; doi:10.1038/srep02425), 2013-08-13
Supplement: srep02425-s1.pdf [file srep02425-s1.pdf]

## Supplemental Information

### Mesenchymal Stem Cells Exploit Extracellular Matrix as Mechanotransducer

Bojun Li, Cameron Moshfegh, Zhe Lin, Jörg Albuschies and Viola Vogel

#### Inventory of Supplemental Information

Supplemental Figures

Supplemental References

#### Supplemental Figures

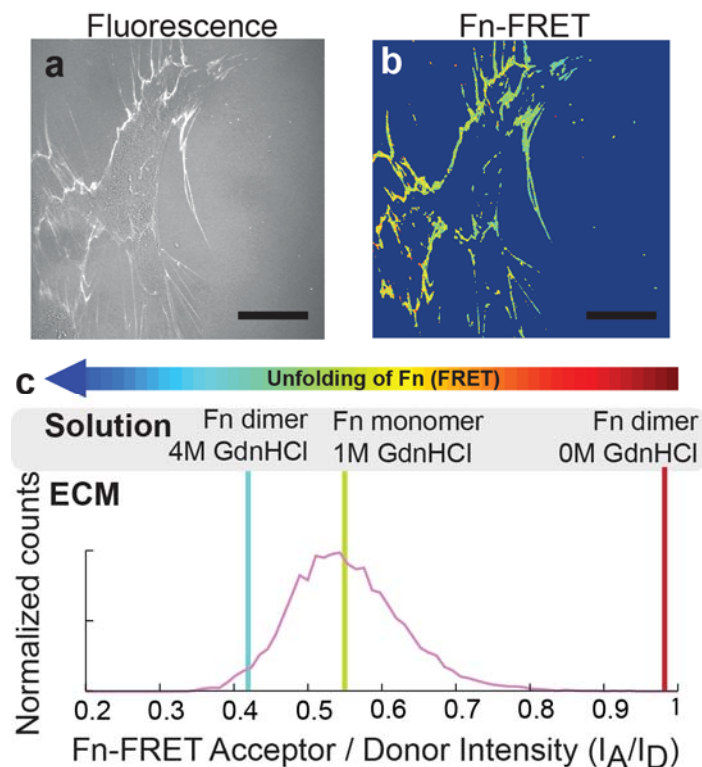

**Figure S1: Undifferentiated hMSCs initially harvest plasma Fn and assemble it into early ECM already within the first 24 hours.**

(a) Merged images of hMSC-assembled Fn ECM (fluorescence image) with brightfield images of hMSCs cultured for 24 hours on glass coverslips in growth medium supplemented with Fn-FRET at low ( $1 \times 10^3$  cells/cm<sup>2</sup>) seeding densities.

(b) FRET false colors of hMSC-assembled Fn ECM at low ( $1 \times 10^3$  cells/cm<sup>2</sup>) seeding densities. The FRET false color scheme represents the relative stretching of Fn fibrils with a color range of red to blue indicating folded to completely unfolded states of Fn, respectively.

(c) Histograms of Fn-FRET  $I_A/I_D$  ratios of hMSC-assembled Fn ECM in 24 hour cultures.

Scale bars: 50 $\mu$ m.

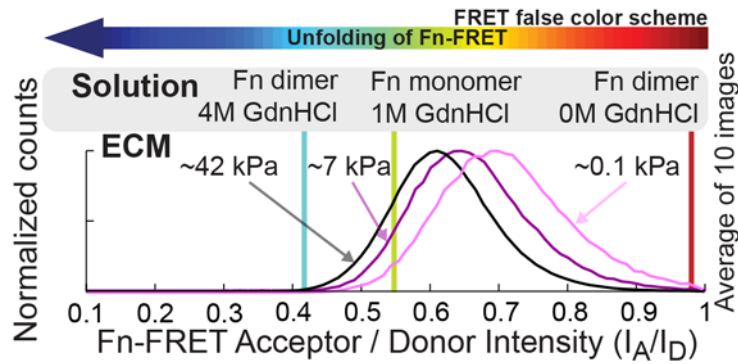

**Figure S2: Stretching of Fn matrix increases with higher substrate rigidity. Related to Figure 2.**

hMSCs were cultured in mixed induction medium supplemented with Fn-FRET and excess unlabeled Fn at an initial seeding density of  $3 \times 10^3/\text{cm}^2$  on Fn-functionalized polyacrylamide substrates of high (~42kPa, black curve), medium (~7kPa, purple curve) and low (~0.1kPa, pink curve) rigidity. Confocal microscopic images of donor and acceptor peak intensities and differential interference contrast images (DIC) were taken  $2\mu\text{m}$  above the glass-cell interface, followed by image analysis using MATLAB. Histograms of average  $I_A/I_D$  ratios of Fn matrices (average of 10 images of each rigidity) are shown. Solution denaturation values for dimeric Fn-FRET in 0M GdnHCl, monomeric Fn-FRET in 1M and dimeric Fn-FRET 4M GdnHCl are shown as red, green and blue lines respectively.

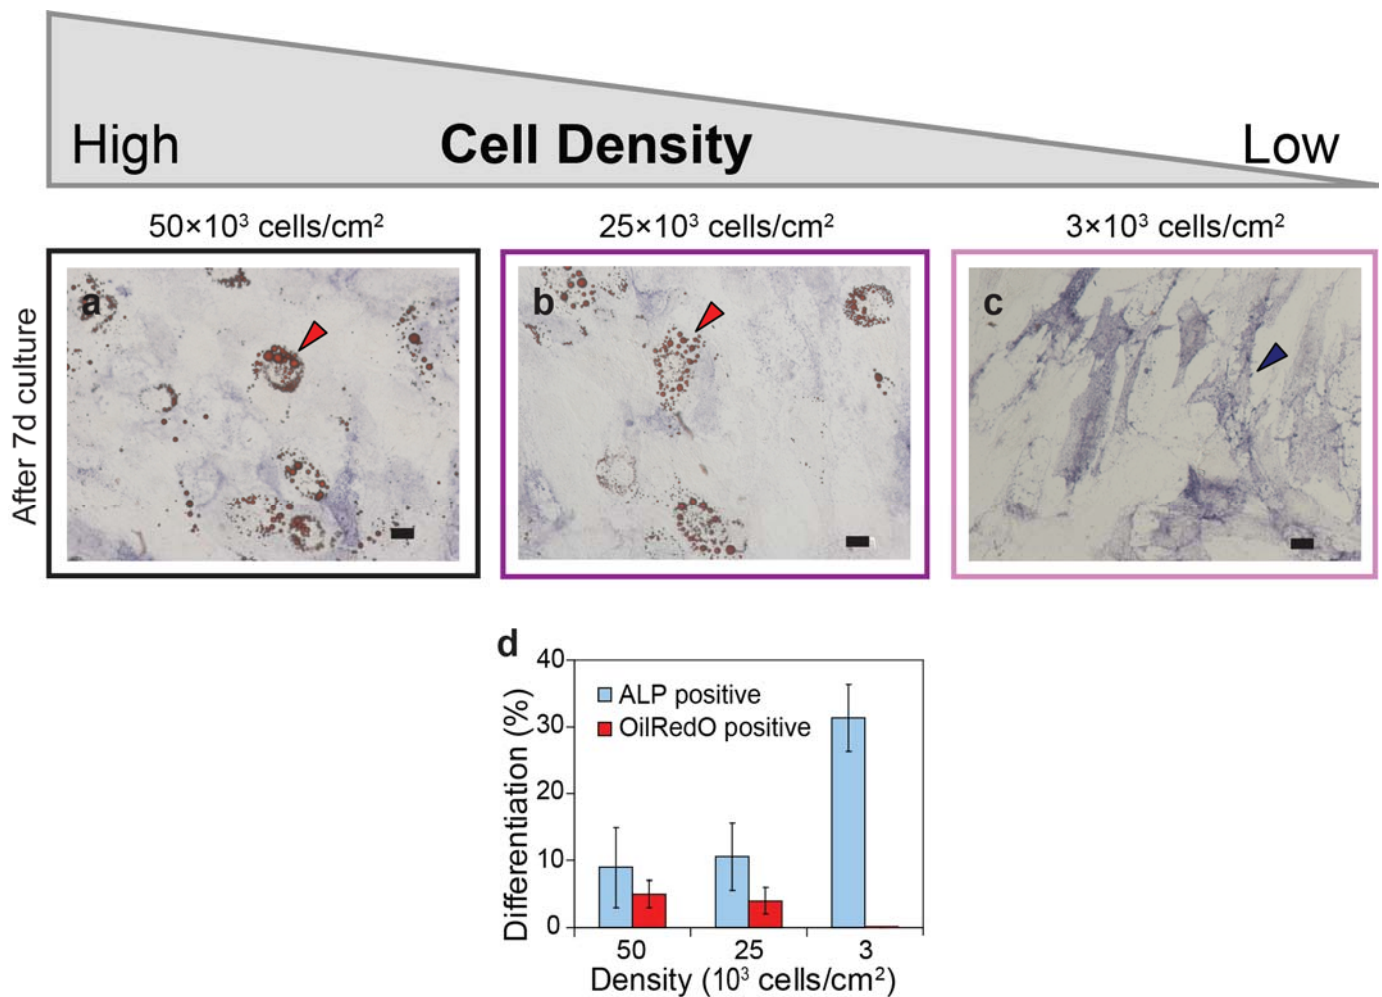

**Figure S3: Higher cell density decreases osteogenesis and increases adipogenesis of hMSCs in 2D.**

(a-c) Brightfield images of hMSCs cultured at seeding densities of 50×10<sup>3</sup> (a), 25×10<sup>3</sup> (b) or 3×10<sup>3</sup> cells/cm<sup>2</sup> (c) for 7 days on glass coverslips in mixed induction medium supplemented with Fn-FRET (5 µg/ml Fn-FRET, 45 µg/ml unlabeled Fn), with histochemical staining for ALP (blue, blue arrows) and OilRedO (red, red arrows). Scale bars: 50µm.

(d) Percentage of OilRedO and ALP positive hMSCs. OilRedO positive cells were mostly suppressed at a seeding density of 3×10<sup>3</sup> cells/cm<sup>2</sup>. Results are shown as the mean ± s.d. (n=3).

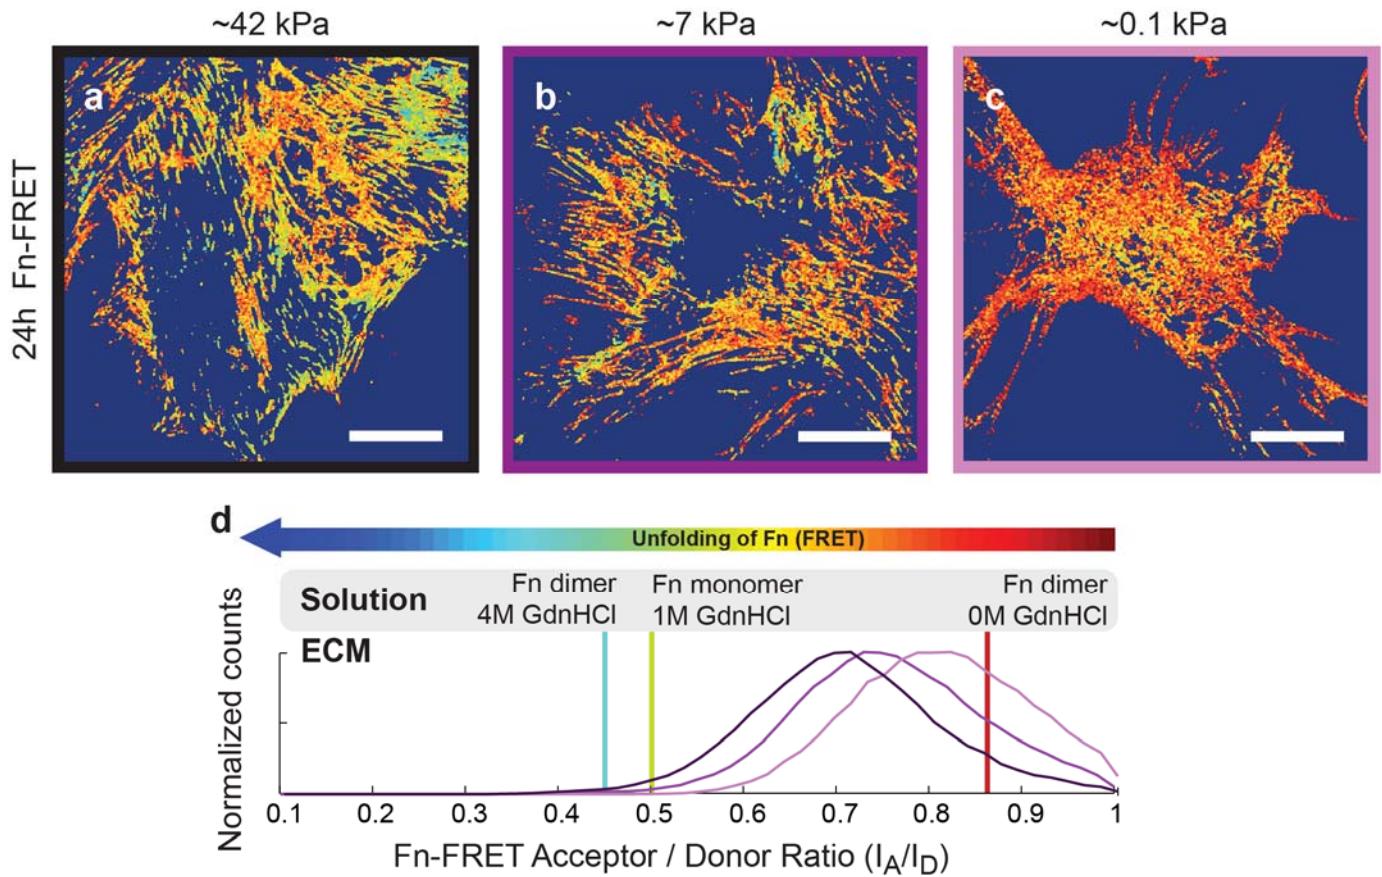

**Figure S4: Stretching of early Fn matrix fibrils correlates with the rigidity of collagen I-functionalized polyacrylamide gels.**

hMSCs were cultured in mixed induction medium supplemented with Fn-FRET and excess unlabeled Fn at an initial seeding density of  $3 \times 10^3/\text{cm}^2$  on collagen I-functionalized polyacrylamide substrates of high (a, black curve), medium (b, purple curve) and low (c, pink curve) rigidity. Histograms of  $I_A/I_D$  ratios of Fn matrices are shown in d. Solution denaturation values for dimeric Fn-FRET in 0M GdnHCl, monomeric Fn-FRET in 1M and dimeric Fn-FRET 4M GdnHCl are shown as red, green and blue lines respectively.



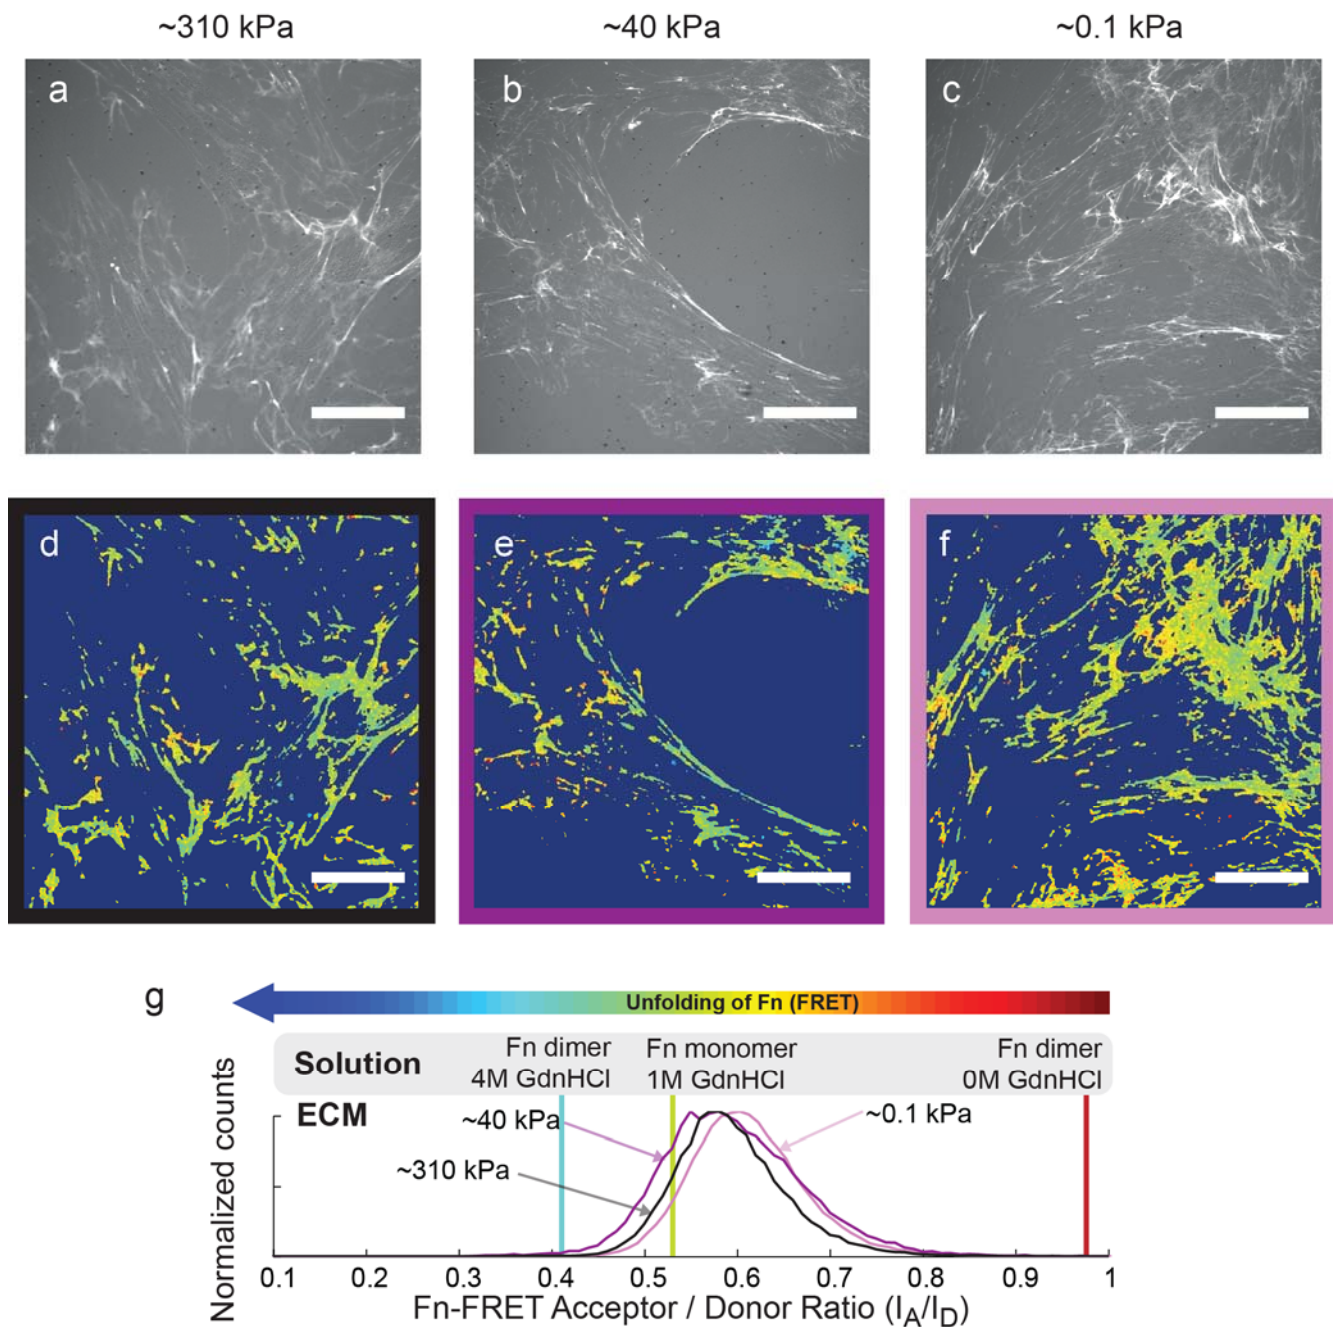

**Figure S5: hMSCs cultured on PDMS substrates of varying rigidity which are covalently crosslinked to Fn as previously described <sup>1</sup>.**

(a-c) Merged images of hMSC-assembled Fn matrices (fluorescence image) with brightfield images of hMSCs cultured on rigid (a, ~310 kPa), medium (b, ~40 kPa) or soft (c, ~0.1 kPa) Fn-functionalized PDMS substrates at a seeding density of  $3 \times 10^3$  cells/cm<sup>2</sup> for 24 hours in growth medium supplemented with trace amounts of Fn-FRET.

(d-f) FRET false colors of hMSC assembled Fn matrices on rigid (d), medium (e) or soft (f) Fn-functionalized PDMS substrates. Scale bars: 50 $\mu$ m.

(g) Histograms of Fn-FRET  $I_A/I_D$  ratios of hMSC assembled 24 hour Fn matrices on rigid (black curve), medium (purple curve) or soft (pink curve) Fn-functionalized PDMS substrates. Solution denaturation values for dimeric Fn-FRET in 0M GdnHCl, monomeric Fn-FRET in 1M and dimeric Fn-FRET 4M GdnHCl are shown as red, green and blue lines respectively.

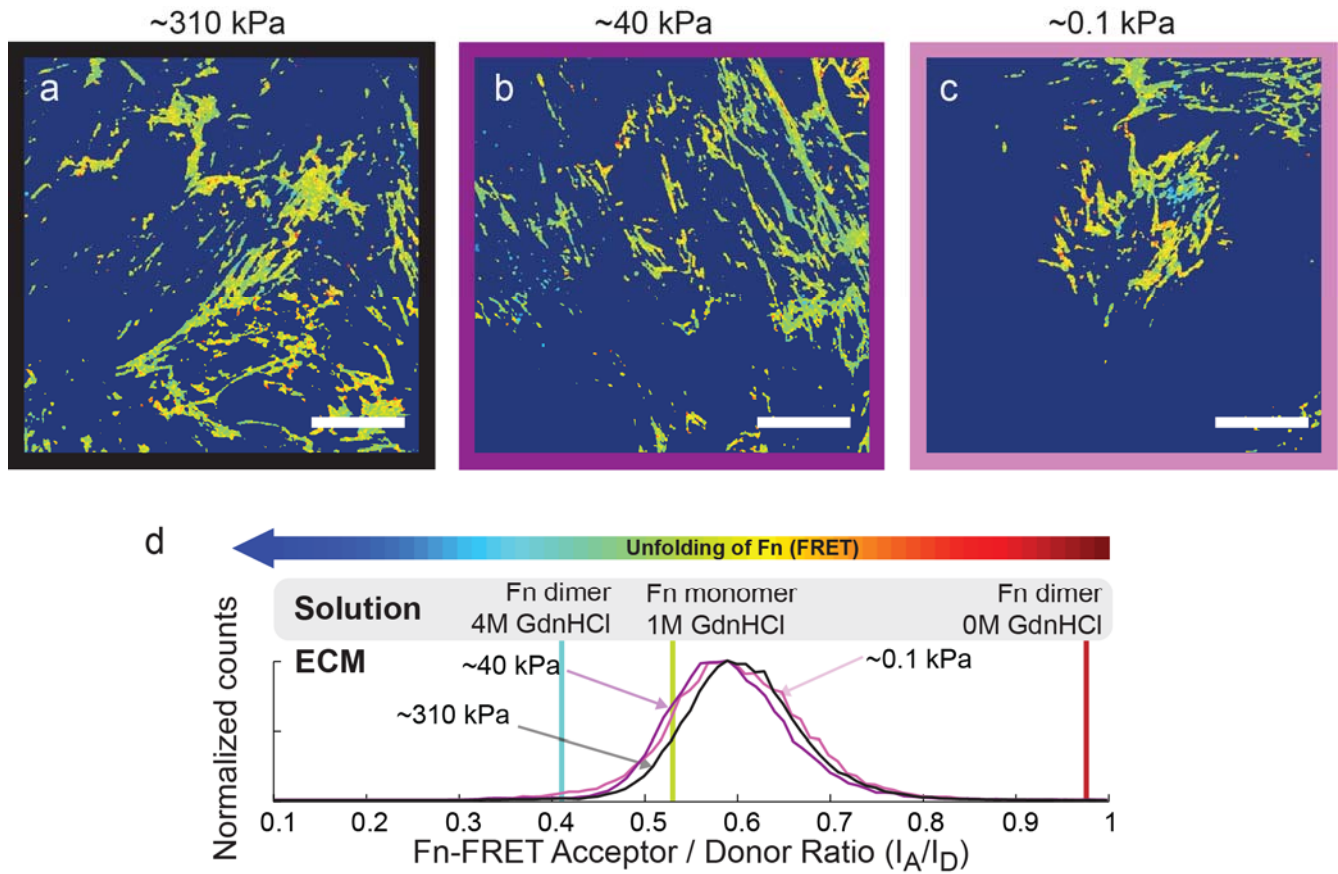

**Figure S6: hMSCs cultured on PDMS substrates of varying rigidity which are crosslinked to collagen I.** (a-c) FRET false colors of hMSC assembled Fn matrices on rigid (a), medium (b) or soft (c) Collagen I-functionalized PDMS substrates. Scale bars: 50 $\mu$ m. (d) Histograms of FRET  $I_A/I_D$  ratios of hMSC assembled 24 hour Fn matrices on rigid (black curve), medium (purple curve) or soft (pink curve) Collagen I-functionalized PDMS substrates. Solution denaturation values for dimeric FRET in 0M GdnHCl, monomeric FRET in 1M and dimeric FRET 4M GdnHCl are shown as red, green and blue lines respectively.

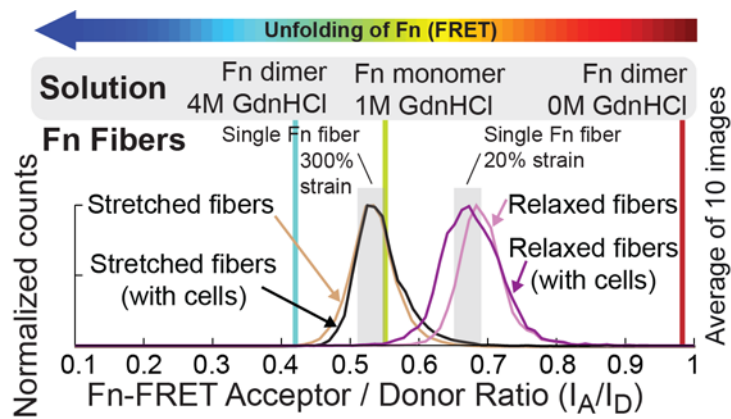

**Figure S7:** Histograms of the average Fn-FRET  $I_A/I_D$  ratios of 10 relaxed fibers before (pink curve) and after cell were cultured for 2 days on these fibers (purple curve), and 10 stretched fibers before (brown curve) and after (black curve). Fiber strains corresponding to 20% and 300% strain are shown as gray bars. Solution denaturation values for dimeric Fn-FRET in 0M, monomeric Fn-FRET in 1M and dimeric Fn-FRET in 4M GdnHCl are shown as red, green and blue vertical lines respectively.

## Supplemental References

1. Trappmann, B. *et al.* Extracellular-matrix tethering regulates stem-cell fate. *Nat. Mater.* **11**, 642-649 (2012).
